# Supplementary material for: Long-term health implications of early life malnutrition: an umbrella review and anticipation of latent attributable disease burden
Source: Research Square preprint supplement (doi:10.21203/rs.3.rs-6231236/v1), 2025-05-09
Supplement: Supplementary file 1 [file 02dcca45c4527cf459143f0e.docx]

**Supplementary Table 2. Criteria for the evaluation of the credibility of the evidence**

|  | **Convincing**  **(Class I)** | **Highly suggestive**  **(Class II)** | **Suggestive**  **(Class III)** | **Weak**  **(Class IV)** | **Non-significant**  **(NS)** |
| --- | --- | --- | --- | --- | --- |
| Random effects p value | <10-6 | <10-6 | <10-3 | <0.05 | >0.05 |
| Number of cases | >1,000  (or >20,000 participants for continuous outcomes) | >1,000  (or >20,000 participants for continuous outcomes) | >1,000  (or >20,000 participants for continuous outcomes) |  |  |
| Heterogeneity | *I*2<50% |  |  |  |  |
| 95% prediction interval | Excludes the null |  |  |  |  |
| Small study effects | No evidence |  |  |  |  |
| Excess significance bias | No evidence |  |  |  |  |
| Largest study with significant effect size | Yes | Yes |  |  |  |
