# Supplementary material for: Long-term health implications of early life malnutrition: an umbrella review and anticipation of latent attributable disease burden
Source: Research Square preprint supplement (doi:10.21203/rs.3.rs-6231236/v1), 2025-05-09
Supplement: Supplementary file 2 [file 0c51bbbae3ea26d259b2116d.docx]

**Supplemental Figure 2.** Tornado diagram.

Male


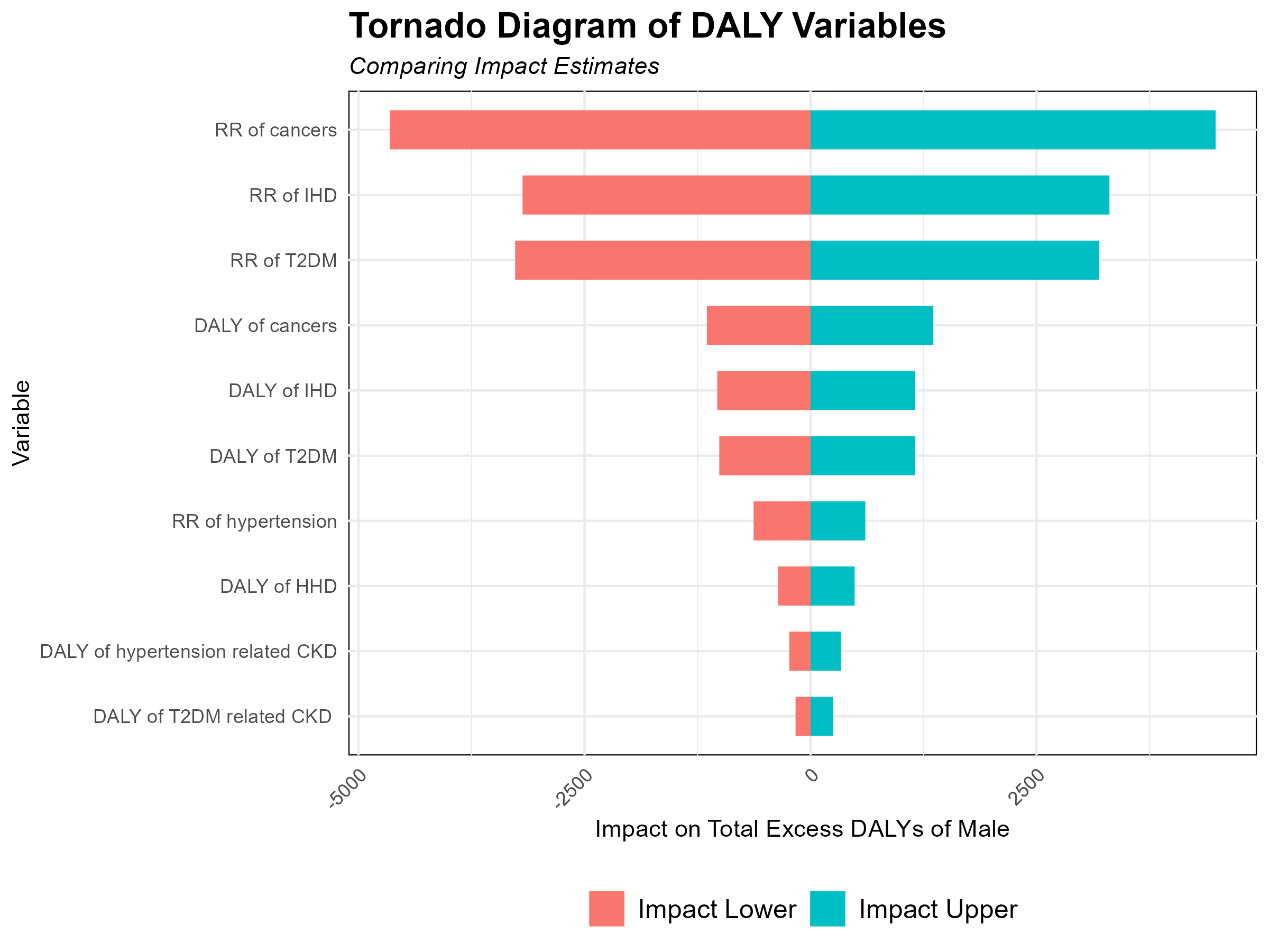


Female


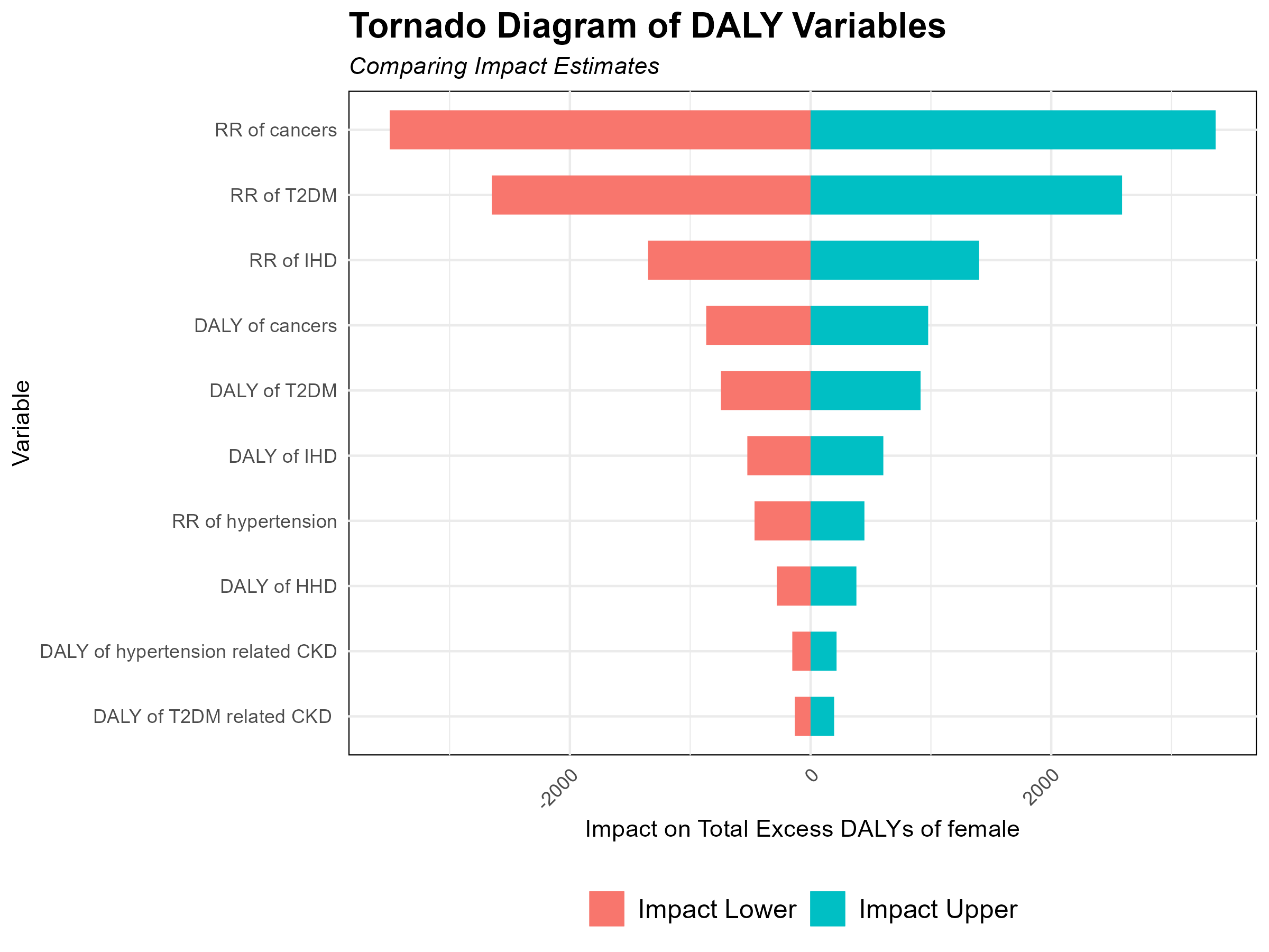


Both


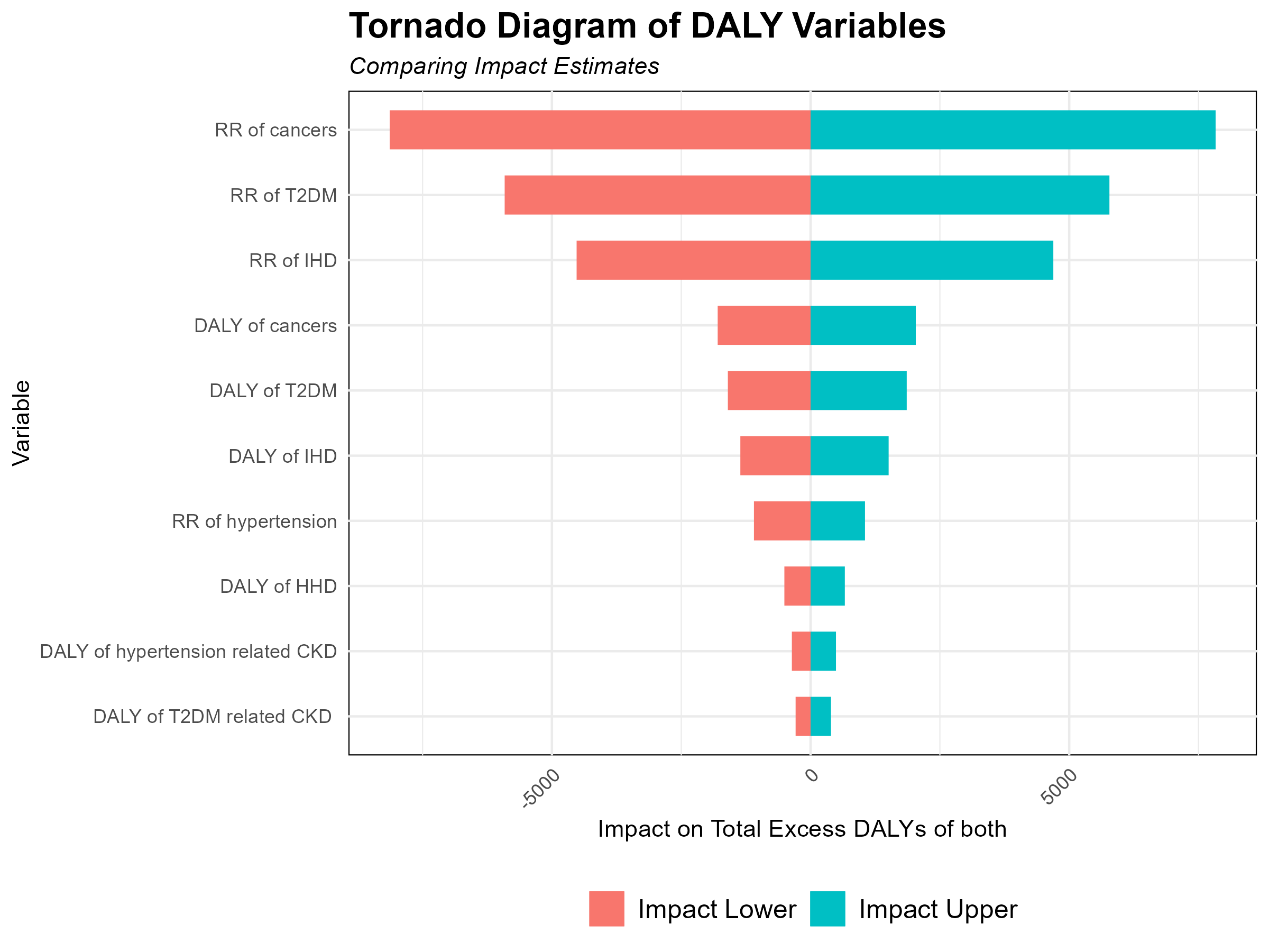


The Tornado Diagram illustrates the related variables that influence DALYs under 50% famine exposure. DALYs: disability-adjusted life years; RR: risk ratio; T2DM: type 2 diabetes mellitus; IHD: ischemic heart disease; HHD: hypertension related heart disease; CKD: chronic kidney disease.
