# Supplementary material for: Long-term health implications of early life malnutrition: an umbrella review and anticipation of latent attributable disease burden
Source: Research Square preprint supplement (doi:10.21203/rs.3.rs-6231236/v1), 2025-05-09
Supplement: Supplementary file 3 [file 112e94e8591ddd71f07e7d4c.xlsx]

## Sheet: Sheet1
Ref	Study ID	Country	Exposure	Health outcomes	Number of studies (total)	Number of studies (cohort)	Number of studies (population based case-control or cross-sectional)	Cases	Sample size	Original statistics	Original effect size (95% CI)	Original I2 (%)	Re-analysis statistics	Re-analysis effect size (95% CI)	Features used for grading the level of evidence												AMSTAR 2	GRADE	Evidence level
															Re-analysis random-effects P value	Re-analysis 95% prediction interval	Re-analysis I2 (%)	Re-analysis Q test P value	Re-analysis Egger's regression P value	Re-analysis Begg's test P value	Re-analysis effect size after trim-and-fill test	Re-analysis small study effect	Re-analysis test of excess significance OE ratio	Re-analysis test of excess significance P value	Re-analysis excess significance bias	Largest study statistically significant
1	Qin 2020	China	Childhood exposure to famine	Metabolic Syndrome	7	1	6	7406	64718	OR	1.29 (1.16, 1.44)	54.7	OR	1.29 (1.16, 1.44)	5.027×10-6	0.90, 1.86	54.749	0.0054	NA	NA	NA	NA	1.16089	0.30094	No	No	Critically Low	Very Low	III
2	Xin 2018	China	Childhood exposure to famine	Hypertension	10	2	8	5845	19864	RR	1.32 (1.15, 1.52)	42.4	RR	1.38 (1.21, 1.57)	1.746×10-6	0.97, 1.96	45.6897	0.0693	0.1318	0.7839	1.29 (1.13, 1.47)	No	1.32002	0.161949	No	No	Critically Low	Very Low	III
3	Zhou 2023	China	Childhood exposure to famine	Cancer	4	3	1	4347	164169	RR	1.29 (0.96, 1.62)	74.8	RR	1.34 (1.08, 1.66)	0.0081	0.72, 2.49	65.7438	0.0007	NA	NA	NA	NA	0.718695	0.727273	No	Yes	Low	Low	IV
4	Zhou 2018	China	Childhood exposure to famine	Overweight	6	3	3	10479	25344	OR	1.09 (0.99, 1.20)	76.6	OR	1.08 (0.95, 1.23)	0.2398	0.71, 1.64	83.6972	<0.0001	NA	NA	NA	NA	0.882961	0.61196	No	No	Low	Very Low	NS
5	Hidayat 2020a	China	Childhood exposure to famine	Type 2 Diabetes	10	5	5	12030	52735	RR	1.33 (1.08 ,1.64)	85.7	RR	1.33 (1.08, 1.64)	0.0075	0.65, 2.73	85.6605	<0.0001	0.0568	0.2449	1.05 (0.85, 1.30)	Yes	1.13105	0.32979	No	Yes	Low	Very Low	IV
5	Hidayat 2020b	China	Childhood exposure to famine	Hyperglycaemia	6	3	3	8870	37118	RR	1.25 (1.10 ,1.42)	60.2	RR	1.25 (1.10, 1.42)	6.911×10-4	0.86, 1.83	60.2147	0.0281	NA	NA	NA	NA	0.968058	0.532226	No	Yes	Low	Very Low	III
5	Hidayat 2020c	China	Childhood exposure to famine	Dyslipidaemia	6	2	4	46205	89505	RR	1.27 (1.12 ,1.45)	62.7	RR	1.27 (1.12, 1.45)	1.748×10-4	0.86, 1.89	62.7507	0.0022	NA	NA	NA	NA	1.12664	0.354405	No	Yes	Low	Low	III
5	Hidayat 2020d	China	Childhood exposure to famine	Obesity	5	2	3	3733	29735	RR	1.13 (1.00 ,1.28)	31	RR	1.13 (1.00, 1.28)	0.0541	0.82, 1.55	31.0175	0.2994	NA	NA	NA	NA	0.827843	0.586001	No	No	Low	Very Low	NS
5	Hidayat 2020e	China	Childhood exposure to famine	Coronary heart disease	2	1	1	15374	74162	RR	1.21 (1.09 ,1.35)	31.3	RR	1.21 (1.09, 1.35)	3.716×10-4	NA	31.2986	0.0263	NA	NA	NA	NA	0.64649	0.822161	No	Yes	Low	Very Low	III
5	Hidayat 2020f	China	Childhood exposure to famine	Stroke	2	1	1	6103	74162	RR	0.95 (0.60, 1.51)	71.8	RR	0.95 (0.60, 1.51)	0.8239	NA	71.7488	0.2166	NA	NA	NA	NA	1.13511	0.432689	No	No	Low	Very Low	NS
6	Arage 2022 Ia	Ethiopia	Childhood exposure to famine	Body mass index	8	8	0	NA	41758	SMD	0.06 (-0.04, 0.15)	91	MD	0.17 (-0.07, 0.41)	0.1765	-0.66, 0.99	91.3951	<0.0001	NA	NA	NA	NA	1.03855	0.458167	No	No	Low	Very Low	NS
6	Arage 2022 Ib	Ethiopia	Childhood exposure to famine	Waist circumference	5	5	0	NA	20792	SMD	0.09 (0.01, 0.16)	94	MD	0.84 (0.10, 1.58)	0.026	-1.58, 3.27	71.6185	0.00700193	NA	NA	NA	NA	0.843838	0.629865	No	No	Low	Very Low	IV
6	Arage 2022 Ic	Ethiopia	Childhood exposure to famine	Adult height	6	6	0	NA	35443	SMD	-0.16 (-0.27, -0.04)	95	MD	-0.95 (-1.46, -0.45)	2.250×10-4	-2.66, 0.76	90.8224	<0.0001	NA	NA	NA	NA	0.690583	0.890204	No	Yes	Low	Very Low	III
7	Arage 2022 IIa	Ethiopia	Childhood exposure to famine	Total cholesterol	4	2	2	NA	5485	SMD	0.18 (0.11, 0.25)	29	MD	0.15 (0.00, 0.31)	0.0496	-0.52, 0.83	92.4591	<0.0001	NA	NA	NA	NA	1.0716	0.4135	No	Yes	Critically Low	Very Low	IV
7	Arage 2022 IIb	Ethiopia	Childhood exposure to famine	Low-density lipoprotein cholesterol	3	1	2	NA	11647	SMD	0.15 (0.07, 0.23)	61	MD	0.15 (0.05, 0.25)	2.233×10-3	-0.94, 1.24	77.225	0.0124	NA	NA	NA	NA	1.3092	0.1677	No	Yes	Critically Low	Very Low	IV
7	Arage 2022 IIc	Ethiopia	Childhood exposure to famine	Triacylglycerol	7	3	4	NA	11780	SMD	0.02 (-0.02, 0.06)	5	MD	0.01 (-0.02, 0.05)	0.4311	-0.05, 0.08	13.8706	0.324	NA	NA	NA	NA	0	0.8062	No	No	Critically Low	Very Low	NS
