# Supplementary material for: Long-term health implications of early life malnutrition: an umbrella review and anticipation of latent attributable disease burden
Source: Research Square preprint supplement (doi:10.21203/rs.3.rs-6231236/v1), 2025-05-09
Supplement: Supplementary file 4 [file 3af880cd00e844bb3605c440.docx]

**Supplementary Table 5. GRADE classification of included meta-analyses on the association between childhood exposure to famine and adulthood health outcome**

| **Study ID** | **Specific outcome** | **Studies, n** | **Study design** | **Risk of bias** | **Inconsistency** | **Indirectness** | **Imprecision** | **Publication bias** | **Magnitude of effect** | **Dose-response gradient** | **Plausible confounding** | **Certainty** |
| --- | --- | --- | --- | --- | --- | --- | --- | --- | --- | --- | --- | --- |
| Qin 2020 | Metabolic Syndrome | 7 | Observational | Serious | Serious | Not Serious | Not Serious | Not Serious | No | No | Would not reduce effect | Very Low |
| Xin 2018 | Hypertension | 10 | Observational | Serious | Serious | Not Serious | Not Serious | Not Serious | No | No | Would not reduce effect | Very Low |
| Zhou 2023 | Cancer | 4 | Observational | Not Serious | Not Serious | Not Serious | Not Serious | Not Serious | No | No | Would not reduce effect | Low |
| Zhou 2018 | Overweight | 6 | Observational | Not Serious | Not Serious | Not Serious | Serious | Not Serious | No | No | Would not reduce effect | Very Low |
| Hidayat 2020a | Type 2 Diabetes | 10 | Observational | Serious | Serious | Not Serious | Not Serious | Serious | No | No | Would not reduce effect | Very Low |
| Hidayat 2020b | Hyperglycaemia | 6 | Observational | Not Serious | Serious | Not Serious | Not Serious | Not Serious | No | No | Would not reduce effect | Very Low |
| Hidayat 2020c | Dyslipidaemia | 6 | Observational | Not Serious | Not Serious | Not Serious | Not Serious | Not Serious | No | No | Would not reduce effect | Low |
| Hidayat 2020d | Obesity | 5 | Observational | Not Serious | Serious | Not Serious | Not Serious | Not Serious | No | No | Would not reduce effect | Very Low |
| Hidayat 2020e | Coronary heart disease | 2 | Observational | Not Serious | Serious | Not Serious | Serious | Not Serious | No | No | Would not reduce effect | Very Low |
| Hidayat 2020f | Stroke | 2 | Observational | Not Serious | Not Serious | Not Serious | Serious | Not Serious | No | No | Would not reduce effect | Very Low |
| Arage 2022 Ia | Body mass index | 8 | Observational | Not Serious | Serious | Not Serious | Serious | Not Serious | No | No | Would not reduce effect | Very Low |
| Arage 2022 Ib | Waist circumference | 5 | Observational | Not Serious | Serious | Not Serious | Not Serious | Not Serious | No | No | Would not reduce effect | Very Low |
| Arage 2022 Ic | Adult height | 6 | Observational | Not Serious | Serious | Not Serious | Not Serious | Not Serious | No | No | Would not reduce effect | Very Low |
| Arage 2022 IIa | Total cholesterol | 4 | Observational | Not Serious | Not Serious | Not Serious | Serious | Not Serious | No | No | Would not reduce effect | Very Low |
| Arage 2022 IIb | Low-density lipoprotein cholesterol | 3 | Observational | Not Serious | Serious | Not Serious | Not Serious | Not Serious | No | No | Would not reduce effect | Very Low |
| Arage 2022 IIc | Triacylglycerol | 11 | Observational | Not Serious | Serious | Not Serious | Serious | Not Serious | No | No | Would not reduce effect | Very Low |
