# Supplementary material for: Long-term health implications of early life malnutrition: an umbrella review and anticipation of latent attributable disease burden
Source: Research Square preprint supplement (doi:10.21203/rs.3.rs-6231236/v1), 2025-05-09
Supplement: Supplementary file 5 [file a247bc9ace84ed08e92c9d37.docx]

**Supplementary Table 6.** The PAF for malnutrition exposure related to various NCDs.

|  | **Malnutrition Prevalence**  **at 40%** | **Malnutrition Prevalence**  **at 50%** | **Malnutrition Prevalence**  **at 60%** | **Malnutrition Prevalence**  **at 70%** | **Malnutrition Prevalence**  **at 80%** | **Malnutrition Prevalence**  **at 90%** | **Malnutrition Prevalence**  **at 100%** |
| --- | --- | --- | --- | --- | --- | --- | --- |
| **Ischemic heart disease** | 0.077(0.031, 0.120) | 0.094(0.038, 0.145) | 0.111(0.045, 0.170) | 0.127(0.052, 0.192) | 0.142(0.060, 0.214) | 0.157(0.066, 0.235) | 0.171(0.073, 0.254) |
| **Hypertension** | 0.131(0.074, 0.182) | 0.158(0.090, 0.218) | 0.184(0.107, 0.250) | 0.208(0.122, 0.280) | 0.230(0.137, 0.308) | 0.252(0.152, 0.334) | 0.272(0.166, 0.358) |
| **Type 2 diabetes** | 0.114(0.019, 0.195) | 0.138(0.023, 0.232) | 0.160(0.028, 0.266) | 0.181(0.032, 0.297) | 0.201(0.037, 0.326) | 0.220(0.041, 0.352) | 0.238(0.046, 0.377) |
| **Cancers** | 0.117(0.020, 0.202) | 0.142(0.025, 0.241) | 0.165(0.030, 0.276) | 0.187(0.035, 0.308) | 0.207(0.040, 0.337) | 0.226(0.045, 0.364) | 0.244(0.050, 0.388) |

PAF: population attributable fraction; NCDs: non-communicable diseases.
