# Supplementary material for: Long-term health implications of early life malnutrition: an umbrella review and anticipation of latent attributable disease burden
Source: Research Square preprint supplement (doi:10.21203/rs.3.rs-6231236/v1), 2025-05-09
Supplement: Supplementary file 6 [file af38fde3a0dc4a04796fb563.docx]

**Supplemental Figure 1.** The excess DALYs of survivors after 50 years of exposure to famine.


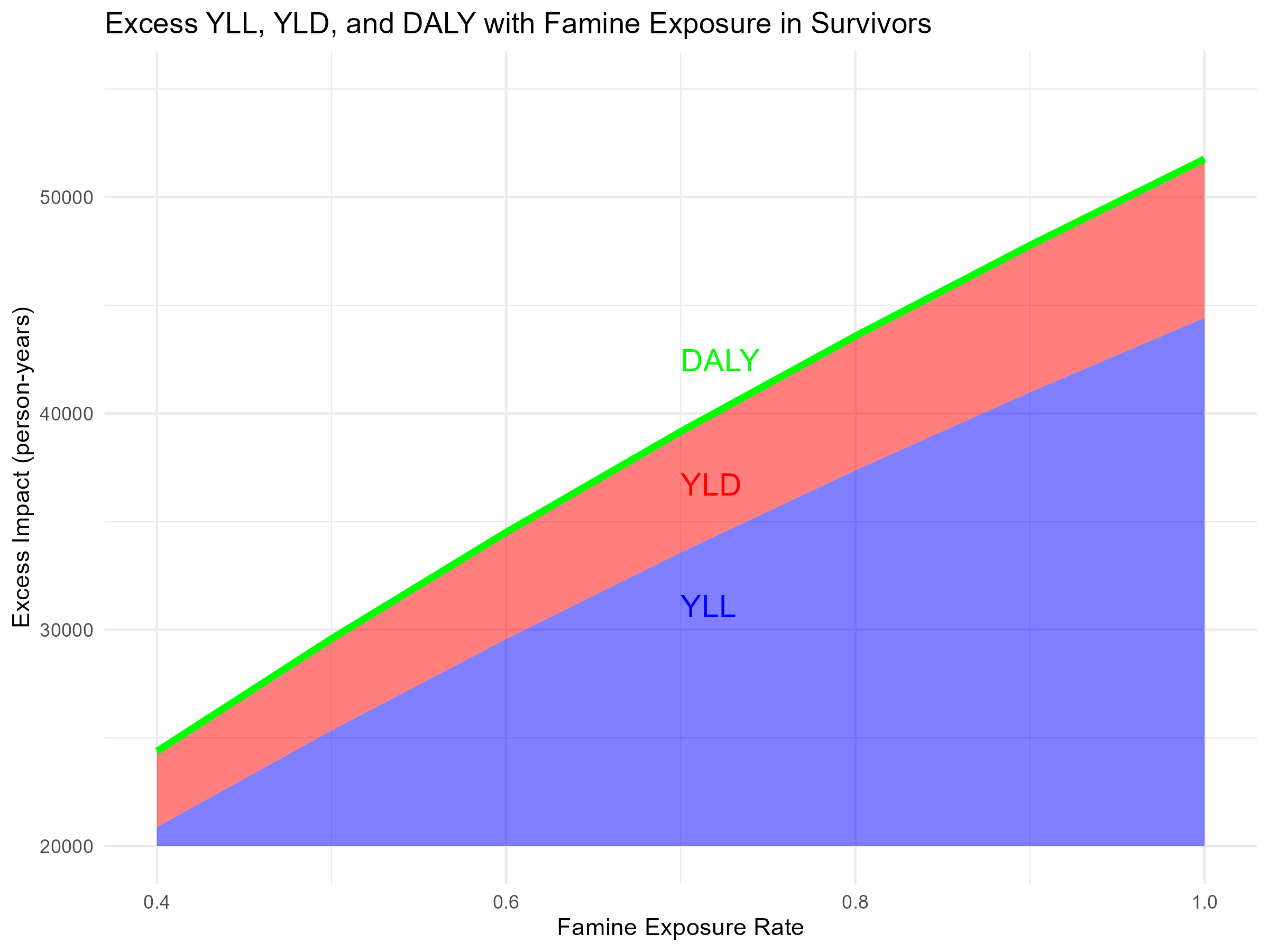


For the Gaza population under 20 years old, under 50% famine exposure, the additional total DALYs after 50 years of exposure to famine are displayed. DALY: disability-adjusted life years; YLD: years lived with disability; YLL: years of life lost.
