# Supplementary material for: Long-term health implications of early life malnutrition: an umbrella review and anticipation of latent attributable disease burden
Source: Research Square preprint supplement (doi:10.21203/rs.3.rs-6231236/v1), 2025-05-09
Supplement: Supplementary file 7 [file bd569cf073a09fcd21623ae7.docx]

**Supplementary Table 1. Adopted search strategies**

| **Database** | **#** | **Search Query** |
| --- | --- | --- |
| **PUBMED/MEDLINE** | **1** | famine[MeSH Terms] OR famine[Title/Abstract] |
| **2** | hunger[MeSH Terms] OR hunger[Title/Abstract] |
| **3** | malnutrition[MeSH Terms] OR malnutrition[Title/Abstract] |
| **4** | undernutrition[Title/Abstract] |
| **5** | malnourishment[Title/Abstract]) |
| **6** | (Meta analysis as topic[MeSH Terms]) OR (Meta analysis[Title/Abstract]) |
| **7** | (Systematic reviews as topic[MeSH Terms]) OR (Systematic review[Title/Abstract]) |
| **8** | pregnancy[MeSH Terms] OR pregnancy[Title/Abstract] |
| **9** | "in utero"[Title/Abstract] |
| **10** | foetal[Title/Abstract] |
| **11** | fetal[Title/Abstract] |
| **12** | infant[MeSH Terms] OR infant[Title/Abstract] |
| **13** | childhood[Title/Abstract] |
| **14** | child[MeSH Terms] OR child[Title/Abstract] |
| **15** | #1 OR #2 OR #3 OR #4 OR #5 |
| **16** | #6 OR #7 |
| **17** | #8 OR #9 OR #10 OR #11 OR #12 OR #13 OR #14 |
| **18** | #15 AND #16 AND #17 |
| **EMBASE** | **1** | famine.mp. |
| **2** | starvation.mp. OR exp starvation/ |
| **3** | hunger.mp. OR exp hunger/ |
| **4** | undernutrition.mp. |
| **5** | undernourishment.mp. |
| **6** | malnutrition.mp. OR exp malnutrition/ |
| **7** | malnourishment.mp. |
| **8** | pregnancy.mp. OR exp pregnancy/ |
| **9** | in utero.mp. |
| **10** | foetal.mp. |
| **11** | fetal.mp. |
| **12** | infant.mp. OR exp infant/ |
| **13** | childhood.mp. OR exp childhood/ |
| **14** | child.mp. OR exp child/ |
| **15** | early-life.mp. |
| **16** | Meta analysis.mp. OR exp Meta analysis |
| **17** | Systematic review.mp. OR exp “Systematic review”/ |
| **18** | #1 OR #2 OR #3 OR #4 OR #5 OR #6 OR #7 |
| **19** | #8 OR #9 |
| **20** | #10 OR #11 OR #12 OR #13 OR #14 OR #15 OR #16 OR #17 |
| **21** | #18 AND #19 AND #20 |
| **Web of Science** | **1** | TS = (Famine OR starvation OR hunger OR undernutrition OR undernourishment OR malnutrition OR malnourishment) |
| **2** | TS = (pregnancy OR "in utero" OR foetal OR fetal OR infant OR childhood OR child OR early-life) |
| **3** | TS = ("meta-analysis" OR "systematic review") |
| **4** | Indexes=SCI-EXPANDED, ESCI Timespan=All years |
| **5** | #1 AND #2 AND #3 AND #4 |
